# Supplementary material for: Intestinal Microbiome in Irritable Bowel Syndrome before and after Gut-Directed Hypnotherapy
Source: MDPI journal article supplement (doi:10.3390/ijms19113619), 2018-11-16
Supplement: s1 [file s1]

# Supplementary File 4. Microbial subgroup analyses.

Subgroup analyses of microbial abundance before and after GHT in patients with adequate relief (n= 32, Table 1), in patients with IBS-D (n= 22, Table 2), and in patients with psychological distress (n= 25, Table 3).

**Table 1.** Subgroup analysis of abundance before and after GHT in patients with adequate relief (n=32)

| Taxonomy                             | <i>p</i> | <i>q</i> |
|--------------------------------------|----------|----------|
| Phylum                               |          |          |
| <i>Cyanobacteria</i>                 | 0.042    | 0.815    |
| Family                               |          |          |
| Other Bacteroidetes                  | 0.011    | 0.815    |
| <i>Eubacteriaceae</i>                | 0.014    | 0.815    |
| Clostridiales Family XI              | 0.021    | 0.815    |
| <i>Lachnospiraceae</i>               | 0.031    | 0.815    |
| Uncultured Gastranaerophilales       | 0.042    | 0.815    |
| Genus                                |          |          |
| <i>Coproccoccus 3</i>                | 0.004    | 0.815    |
| Uncultured Lachnospiraceae           | 0.013    | 0.815    |
| Other Bacteroidetes                  | 0.015    | 0.815    |
| <i>Anaerofilum</i>                   | 0.020    | 0.815    |
| Uncultured Ruminococcaceae 9         | 0.025    | 0.815    |
| <i>Coproccoccus 2</i>                | 0.033    | 0.815    |
| Uncultured Gastranaerophilales       | 0.042    | 0.815    |
| <i>Eubacterium ventriosum group</i>  | 0.043    | 0.815    |
| <i>Ruminococcus gauvreauii group</i> | 0.043    | 0.815    |
| Other Lachnospiraceae                | 0.043    | 0.815    |
| Uncultured Lachnospiraceae 10        | 0.050    | 0.815    |

Relative abundances of taxa with changes  $p < 0.05$  in percent, Median [Q1-Q3]. *q*-values are FDR-corrected *p*-values.

**Table 2.** Subgroup analysis of abundance before and after GHT in patients with IBS-D (n=22)

| Taxonomy                     | <i>p</i> | <i>q</i> |
|------------------------------|----------|----------|
| Family                       |          |          |
| Clostridiales Family XI      | 0.030    | 1        |
| <i>Veillonellaceae</i>       | 0.043    | 1        |
| Genus                        |          |          |
| <i>Anaerofilum</i>           | 0.014    | 1        |
| <i>Lachnospiraceae UCG10</i> | 0.016    | 1        |
| <i>Ruminococcaceae UCG11</i> | 0.022    | 1        |
| <i>Ruminococcus 2</i>        | 0.024    | 1        |
| <i>Other Clostridiaceae</i>  | 0.046    | 1        |

Relative abundances of taxa with changes  $p < 0.05$  in percent, Median [Q1-Q3]. *q*-values are FDR-corrected *p*-values.

**Table 3.** Subgroup analysis of abundance before and after GHT in patients with psychological distress (n= 25).

| <b>Taxonomy</b>               | <b><i>p</i></b> | <b><i>q</i></b> |
|-------------------------------|-----------------|-----------------|
| Families                      |                 |                 |
| <i>Veillonellaceae</i>        | 0.008           | 0.998           |
| <i>Fusobacteriaceae</i>       | 0.034           | 0.998           |
| Genera                        |                 |                 |
| <i>Coproccoccus 3</i>         | 0.012           | 0.998           |
| <i>Ruminococcaceae UCG009</i> | 0.014           | 0.998           |
| <i>Lachnospiraceae UCG010</i> | 0.021           | 0.998           |
| <i>Anaerofilum</i>            | 0.024           | 0.998           |
| <i>Coproccoccus 2</i>         | 0.028           | 0.998           |

Relative abundances of taxa with changes  $p < 0.05$  in percent, Median [Q1-Q3]. *q*-values are FDR-corrected *p*-values.
