# Supplementary material for: Intestinal Microbiome in Irritable Bowel Syndrome before and after Gut-Directed Hypnotherapy
Source: Int J Mol Sci. 2018 Nov 16;19(11):3619. doi: 10.3390/ijms19113619 (PMC6274728; doi:10.3390/ijms19113619)
Supplement: Supplementary file 1 [file ijms-19-03619-s001.zip]

Archive with 6 entries (6 files):
- Supplement 1.pdf
- Supplement 2.xlsx
- Supplement 3.xlsx
- Supplement 4.pdf
- Supplement 5.pdf
- Supplement 6.pdf
