# Supplementary material for: Intestinal Microbiome in Irritable Bowel Syndrome before and after Gut-Directed Hypnotherapy
Source: Int J Mol Sci. 2018 Nov 16;19(11):3619. doi: 10.3390/ijms19113619 (PMC6274728; doi:10.3390/ijms19113619)
Supplement: Supplementary file 1 [file ijms-19-03619-s001.zip › Supplement 2.xlsx]

## Sheet: OTU testing per timepoint 1632
Supplemental Table S2. OTUs with differential abundance before and after GHT.
OTU	Test-Statistic	P	FDR_P	Bonferroni_P	3_mean	2_mean	taxonomy
DQ799771.1.1395	9.43373	0.00213031	1	1	0.552632	1.42105	D_0__Bacteria; D_1__Firmicutes; D_2__Clostridia; D_3__Clostridiales; D_4__Lachnospiraceae; D_5__Blautia; D_6__uncultured bacterium; D_7__; D_8__; D_9__; D_10__; D_11__; D_12__; D_13__; D_14__
KF841876.1.1361	8.80266	0.00300791	1	1	0	0.289474	D_0__Bacteria; D_1__Firmicutes; D_2__Clostridia; D_3__Clostridiales; D_4__Ruminococcaceae; D_5__Ruminococcaceae UCG-013; D_6__uncultured bacterium; D_7__; D_8__; D_9__; D_10__; D_11__; D_12__; D_13__; D_14__
New.CleanUp.ReferenceOTU87038	8.56496	0.00342695	1	1	0.315789	0.0263158	D_0__Bacteria; D_1__Firmicutes; D_2__Clostridia; D_3__Clostridiales; D_4__Lachnospiraceae
New.CleanUp.ReferenceOTU67804	7.6	0.00583683	1	1	0	0.236842	D_0__Bacteria; D_1__Firmicutes; D_2__Clostridia; D_3__Clostridiales; D_4__Ruminococcaceae; D_5__Faecalibacterium; D_6__uncultured bacterium; D_7__; D_8__; D_9__; D_10__; D_11__; D_12__; D_13__; D_14__
EU467357.1.1370	7.5938	0.00585693	1	1	0	0.263158	D_0__Bacteria; D_1__Firmicutes; D_2__Clostridia; D_3__Clostridiales; D_4__Lachnospiraceae; D_5__Lachnoclostridium; D_6__uncultured bacterium; D_7__; D_8__; D_9__; D_10__; D_11__; D_12__; D_13__; D_14__
New.CleanUp.ReferenceOTU61207	7.5938	0.00585693	1	1	0.289474	0	D_0__Bacteria; D_1__Firmicutes; D_2__Clostridia; D_3__Clostridiales; D_4__Lachnospiraceae
New.CleanUp.ReferenceOTU203099	7.5938	0.00585693	1	1	0.263158	0	D_0__Bacteria; D_1__Firmicutes; D_2__Clostridia; D_3__Clostridiales; D_4__Lachnospiraceae; D_5__Lachnoclostridium; D_6__uncultured bacterium; D_7__; D_8__; D_9__; D_10__; D_11__; D_12__; D_13__; D_14__
New.CleanUp.ReferenceOTU275412	7.59132	0.00586499	1	1	0.263158	0	D_0__Bacteria; D_1__Firmicutes; D_2__Clostridia; D_3__Clostridiales; D_4__Lachnospiraceae; D_5__Pseudobutyrivibrio; D_6__uncultured bacterium; D_7__; D_8__; D_9__; D_10__; D_11__; D_12__; D_13__; D_14__
New.CleanUp.ReferenceOTU461967	7.59132	0.00586499	1	1	0	0.263158	D_0__Bacteria; D_1__Firmicutes; D_2__Clostridia; D_3__Clostridiales; D_4__Lachnospiraceae; D_5__Lachnoclostridium
New.CleanUp.ReferenceOTU61668	7.38605	0.00657315	1	1	0.315789	0.0263158	D_0__Bacteria; D_1__Firmicutes; D_2__Clostridia; D_3__Clostridiales; D_4__Lachnospiraceae; D_5__Incertae Sedis; D_6__uncultured bacterium; D_7__; D_8__; D_9__; D_10__; D_11__; D_12__; D_13__; D_14__
EU467012.1.1391	7.24651	0.0071039	1	1	0.394737	1.05263	D_0__Bacteria; D_1__Firmicutes; D_2__Clostridia; D_3__Clostridiales; D_4__Lachnospiraceae; D_5__[Eubacterium] hallii group; D_6__uncultured bacterium; D_7__; D_8__; D_9__; D_10__; D_11__; D_12__; D_13__; D_14__
New.ReferenceOTU820	6.61806	0.010095	1	1	0.0526316	0.421053	D_0__Bacteria; D_1__Firmicutes; D_2__Clostridia; D_3__Clostridiales; D_4__Lachnospiraceae
DQ799560.1.1390	6.42857	0.0112299	1	1	0	0.157895	D_0__Bacteria; D_1__Firmicutes; D_2__Clostridia; D_3__Clostridiales; D_4__Lachnospiraceae; D_5__Roseburia; D_6__uncultured bacterium; D_7__; D_8__; D_9__; D_10__; D_11__; D_12__; D_13__; D_14__
EU475681.1.1364	6.42857	0.0112299	1	1	0.157895	0	D_0__Bacteria; D_1__Firmicutes; D_2__Clostridia; D_3__Clostridiales; D_4__Peptostreptococcaceae
New.CleanUp.ReferenceOTU146436	6.42857	0.0112299	1	1	0.157895	0	D_0__Bacteria; D_1__Bacteroidetes; D_2__Bacteroidia; D_3__Bacteroidales; D_4__Rikenellaceae; D_5__Alistipes; D_6__uncultured bacterium; D_7__; D_8__; D_9__; D_10__; D_11__; D_12__; D_13__; D_14__
New.CleanUp.ReferenceOTU388580	6.42857	0.0112299	1	1	0.157895	0	Unassigned
DQ805978.1.1390	6.42254	0.0112681	1	1	0	0.210526	D_0__Bacteria; D_1__Firmicutes; D_2__Clostridia; D_3__Clostridiales; D_4__Lachnospiraceae; D_5__Blautia; D_6__uncultured bacterium; D_7__; D_8__; D_9__; D_10__; D_11__; D_12__; D_13__; D_14__
FJ366114.1.1376	6.42254	0.0112681	1	1	0.184211	0	D_0__Bacteria; D_1__Firmicutes; D_2__Bacilli; D_3__Lactobacillales; D_4__Streptococcaceae; D_5__Streptococcus
New.CleanUp.ReferenceOTU400079	6.41892	0.0112911	1	1	0.210526	0	D_0__Bacteria; D_1__Firmicutes; D_2__Clostridia; D_3__Clostridiales; D_4__Lachnospiraceae
New.CleanUp.ReferenceOTU9367	6.41852	0.0112936	1	1	0	0.236842	D_0__Bacteria; D_1__Firmicutes; D_2__Clostridia; D_3__Clostridiales; D_4__Lachnospiraceae; D_5__Blautia; D_6__uncultured bacterium; D_7__; D_8__; D_9__; D_10__; D_11__; D_12__; D_13__; D_14__
New.CleanUp.ReferenceOTU111857	6.41651	0.0113064	1	1	0	0.289474	Unassigned
GQ267931.1.1487	6.41491	0.0113166	1	1	0.710526	0	D_0__Bacteria; D_1__Firmicutes; D_2__Bacilli; D_3__Lactobacillales; D_4__Lactobacillaceae; D_5__Lactobacillus; D_6__uncultured bacterium; D_7__; D_8__; D_9__; D_10__; D_11__; D_12__; D_13__; D_14__
New.CleanUp.ReferenceOTU563072	6.23474	0.0125268	1	1	0.210526	1.34211	D_0__Bacteria; D_1__Firmicutes; D_2__Clostridia; D_3__Clostridiales; D_4__Lachnospiraceae; D_5__Pseudobutyrivibrio; D_6__uncultured bacterium; D_7__; D_8__; D_9__; D_10__; D_11__; D_12__; D_13__; D_14__
DQ802213.1.1392	6.1308	0.0132846	1	1	0.263158	0.0263158	D_0__Bacteria; D_1__Firmicutes; D_2__Clostridia; D_3__Clostridiales; D_4__Lachnospiraceae
New.CleanUp.ReferenceOTU356322	6.09453	0.0135601	1	1	0.0263158	0.210526	D_0__Bacteria; D_1__Firmicutes; D_2__Clostridia; D_3__Clostridiales; D_4__Lachnospiraceae
New.CleanUp.ReferenceOTU475464	6.09453	0.0135601	1	1	0.210526	0.0263158	D_0__Bacteria; D_1__Firmicutes; D_2__Clostridia; D_3__Clostridiales; D_4__Lachnospiraceae
New.CleanUp.ReferenceOTU188094	6.07976	0.013674	1	1	0.105263	0.447368	D_0__Bacteria; D_1__Firmicutes; D_2__Clostridia; D_3__Clostridiales; D_4__Lachnospiraceae; D_5__Fusicatenibacter; D_6__uncultured bacterium; D_7__; D_8__; D_9__; D_10__; D_11__; D_12__; D_13__; D_14__
New.ReferenceOTU1254	5.96079	0.0146275	1	1	0.105263	0.368421	D_0__Bacteria; D_1__Firmicutes; D_2__Clostridia; D_3__Clostridiales; D_4__Ruminococcaceae; D_5__Subdoligranulum; D_6__uncultured bacterium; D_7__; D_8__; D_9__; D_10__; D_11__; D_12__; D_13__; D_14__
New.CleanUp.ReferenceOTU506531	5.89102	0.0152183	1	1	0.0526316	0.315789	D_0__Bacteria; D_1__Firmicutes; D_2__Clostridia; D_3__Clostridiales; D_4__Lachnospiraceae
DQ805274.1.1359	5.86495	0.0154453	1	1	0.394737	0.210526	D_0__Bacteria; D_1__Firmicutes; D_2__Clostridia; D_3__Clostridiales; D_4__Lachnospiraceae; D_5__Blautia; D_6__uncultured bacterium; D_7__; D_8__; D_9__; D_10__; D_11__; D_12__; D_13__; D_14__
New.CleanUp.ReferenceOTU512236	5.76214	0.0163751	1	1	0.236842	0.0526316	D_0__Bacteria; D_1__Firmicutes; D_2__Clostridia; D_3__Clostridiales; D_4__Lachnospiraceae; D_5__Lachnoclostridium; D_6__uncultured bacterium; D_7__; D_8__; D_9__; D_10__; D_11__; D_12__; D_13__; D_14__
New.CleanUp.ReferenceOTU81647	5.72687	0.0167072	1	1	0.473684	0.157895	D_0__Bacteria; D_1__Firmicutes; D_2__Bacilli; D_3__Lactobacillales; D_4__Streptococcaceae; D_5__Streptococcus; D_6__uncultured bacterium; D_7__; D_8__; D_9__; D_10__; D_11__; D_12__; D_13__; D_14__
EU765799.1.1360	5.5724	0.0182458	1	1	0.789474	0.210526	D_0__Bacteria; D_1__Firmicutes; D_2__Clostridia; D_3__Clostridiales; D_4__Lachnospiraceae
New.CleanUp.ReferenceOTU459750	5.51559	0.0188478	1	1	0.421053	1.13158	D_0__Bacteria; D_1__Firmicutes; D_2__Clostridia; D_3__Clostridiales; D_4__Lachnospiraceae
New.ReferenceOTU1190	5.5031	0.0189828	1	1	0.447368	1.76316	D_0__Bacteria; D_1__Firmicutes; D_2__Clostridia; D_3__Clostridiales; D_4__Lachnospiraceae; D_5__Roseburia; D_6__uncultured bacterium; D_7__; D_8__; D_9__; D_10__; D_11__; D_12__; D_13__; D_14__
New.CleanUp.ReferenceOTU292042	5.48151	0.0192187	1	1	0.631579	0.236842	D_0__Bacteria; D_1__Firmicutes; D_2__Clostridia; D_3__Clostridiales; D_4__Lachnospiraceae; D_5__Roseburia; D_6__uncultured bacterium; D_7__; D_8__; D_9__; D_10__; D_11__; D_12__; D_13__; D_14__
GQ493374.1.1373	5.29142	0.0214307	1	1	2.36842	1.42105	D_0__Bacteria; D_1__Firmicutes; D_2__Clostridia; D_3__Clostridiales; D_4__Lachnospiraceae; D_5__Lachnoclostridium; D_6__uncultured bacterium; D_7__; D_8__; D_9__; D_10__; D_11__; D_12__; D_13__; D_14__
New.CleanUp.ReferenceOTU309332	5.28169	0.0215508	1	1	0	0.131579	Unassigned
New.ReferenceOTU728	5.27778	0.0215993	1	1	0.184211	0	D_0__Bacteria; D_1__Firmicutes; D_2__Clostridia; D_3__Clostridiales; D_4__Lachnospiraceae
New.ReferenceOTU713	5.27778	0.0215993	1	1	0	0.184211	D_0__Bacteria; D_1__Firmicutes; D_2__Clostridia; D_3__Clostridiales; D_4__Christensenellaceae; D_5__Christensenellaceae R-7 group; D_6__uncultured bacterium; D_7__; D_8__; D_9__; D_10__; D_11__; D_12__; D_13__; D_14__
New.CleanUp.ReferenceOTU51074	5.27778	0.0215993	1	1	0	0.394737	D_0__Bacteria; D_1__Firmicutes; D_2__Clostridia; D_3__Clostridiales; D_4__Lachnospiraceae; D_5__Roseburia
New.CleanUp.ReferenceOTU229028	5.27778	0.0215993	1	1	0	0.157895	Unassigned
New.CleanUp.ReferenceOTU235359	5.27778	0.0215993	1	1	0.157895	0	D_0__Bacteria; D_1__Firmicutes; D_2__Clostridia; D_3__Clostridiales; D_4__Lachnospiraceae
New.CleanUp.ReferenceOTU376555	5.27778	0.0215993	1	1	0	0.157895	D_0__Bacteria; D_1__Firmicutes; D_2__Clostridia; D_3__Clostridiales; D_4__Lachnospiraceae; D_5__Pseudobutyrivibrio; D_6__uncultured bacterium; D_7__; D_8__; D_9__; D_10__; D_11__; D_12__; D_13__; D_14__
New.CleanUp.ReferenceOTU399495	5.27778	0.0215993	1	1	0	0.210526	D_0__Bacteria; D_1__Firmicutes; D_2__Clostridia; D_3__Clostridiales; D_4__Lachnospiraceae; D_5__Lachnoclostridium; D_6__uncultured bacterium; D_7__; D_8__; D_9__; D_10__; D_11__; D_12__; D_13__; D_14__
KF101938.1.1368	5.27582	0.0216236	1	1	0.210526	0	D_0__Bacteria; D_1__Firmicutes; D_2__Bacilli; D_3__Lactobacillales; D_4__Streptococcaceae; D_5__Streptococcus; D_6__uncultured bacterium; D_7__; D_8__; D_9__; D_10__; D_11__; D_12__; D_13__; D_14__
New.ReferenceOTU134	5.27543	0.0216284	1	1	0.447368	0	D_0__Bacteria; D_1__Firmicutes; D_2__Clostridia; D_3__Clostridiales; D_4__Lachnospiraceae; D_5__uncultured
New.CleanUp.ReferenceOTU516921	5.27543	0.0216284	1	1	0	0.342105	D_0__Bacteria; D_1__Firmicutes; D_2__Clostridia; D_3__Clostridiales; D_4__Ruminococcaceae; D_5__Ruminococcus 2; D_6__uncultured bacterium; D_7__; D_8__; D_9__; D_10__; D_11__; D_12__; D_13__; D_14__
New.CleanUp.ReferenceOTU238647	5.27465	0.0216381	1	1	0	0.263158	D_0__Bacteria; D_1__Firmicutes; D_2__Clostridia; D_3__Clostridiales; D_4__Lachnospiraceae; D_5__Lachnoclostridium; D_6__uncultured bacterium; D_7__; D_8__; D_9__; D_10__; D_11__; D_12__; D_13__; D_14__
New.CleanUp.ReferenceOTU78000	5.2069	0.0224974	1	1	0.263158	0.0526316	D_0__Bacteria; D_1__Firmicutes; D_2__Clostridia; D_3__Clostridiales; D_4__Lachnospiraceae; D_5__Pseudobutyrivibrio; D_6__uncultured bacterium; D_7__; D_8__; D_9__; D_10__; D_11__; D_12__; D_13__; D_14__
New.CleanUp.ReferenceOTU459959	5.03899	0.0247829	1	1	0.0263158	0.236842	D_0__Bacteria; D_1__Firmicutes; D_2__Clostridia; D_3__Clostridiales; D_4__Lachnospiraceae; D_5__Fusicatenibacter; D_6__uncultured bacterium; D_7__; D_8__; D_9__; D_10__; D_11__; D_12__; D_13__; D_14__
New.CleanUp.ReferenceOTU72758	5.03875	0.0247864	1	1	0.0263158	0.315789	D_0__Bacteria; D_1__Firmicutes; D_2__Clostridia; D_3__Clostridiales; D_4__Lachnospiraceae
New.CleanUp.ReferenceOTU149046	5.03322	0.0248656	1	1	0.0789474	0.368421	D_0__Bacteria; D_1__Firmicutes; D_2__Clostridia; D_3__Clostridiales; D_4__Ruminococcaceae; D_5__uncultured; D_6__uncultured bacterium; D_7__; D_8__; D_9__; D_10__; D_11__; D_12__; D_13__; D_14__
GQ267917.1.1474	5.01393	0.0251441	1	1	9.92105	5.89474	D_0__Bacteria; D_1__Firmicutes; D_2__Bacilli; D_3__Lactobacillales; D_4__Streptococcaceae; D_5__Lactococcus
New.CleanUp.ReferenceOTU242862	5.0001	0.0253459	1	1	0.236842	0.0263158	D_0__Bacteria; D_1__Firmicutes; D_2__Clostridia; D_3__Clostridiales; D_4__Ruminococcaceae; D_5__Faecalibacterium; D_6__uncultured bacterium; D_7__; D_8__; D_9__; D_10__; D_11__; D_12__; D_13__; D_14__
New.CleanUp.ReferenceOTU335877	5.0001	0.0253459	1	1	0.236842	0.0263158	D_0__Bacteria; D_1__Firmicutes; D_2__Clostridia; D_3__Clostridiales; D_4__Peptostreptococcaceae; D_5__Peptoclostridium; D_6__uncultured bacterium; D_7__; D_8__; D_9__; D_10__; D_11__; D_12__; D_13__; D_14__
New.CleanUp.ReferenceOTU583338	5.0001	0.0253459	1	1	0.210526	0.0263158	D_0__Bacteria; D_1__Firmicutes; D_2__Clostridia; D_3__Clostridiales; D_4__Ruminococcaceae; D_5__Subdoligranulum; D_6__uncultured bacterium; D_7__; D_8__; D_9__; D_10__; D_11__; D_12__; D_13__; D_14__
New.ReferenceOTU195	4.97738	0.0256808	1	1	0.526316	1.52632	D_0__Bacteria; D_1__Firmicutes; D_2__Clostridia; D_3__Clostridiales; D_4__Lachnospiraceae
New.ReferenceOTU346	4.96324	0.0258917	1	1	0.0263158	0.184211	D_0__Bacteria; D_1__Firmicutes; D_2__Bacilli; D_3__Lactobacillales; D_4__Streptococcaceae; D_5__Streptococcus; D_6__uncultured bacterium; D_7__; D_8__; D_9__; D_10__; D_11__; D_12__; D_13__; D_14__
New.CleanUp.ReferenceOTU159513	4.92452	0.0264781	1	1	0.0789474	0.289474	D_0__Bacteria; D_1__Firmicutes; D_2__Clostridia; D_3__Clostridiales; D_4__Lachnospiraceae
New.ReferenceOTU1210	4.86459	0.0274132	1	1	0.0789474	0.368421	D_0__Bacteria; D_1__Firmicutes; D_2__Clostridia; D_3__Clostridiales; D_4__Lachnospiraceae
New.ReferenceOTU594	4.83255	0.0279272	1	1	0.736842	1.26316	D_0__Bacteria; D_1__Firmicutes; D_2__Clostridia; D_3__Clostridiales; D_4__Lachnospiraceae
New.CleanUp.ReferenceOTU349445	4.77606	0.0288581	1	1	0.263158	0.0526316	D_0__Bacteria; D_1__Firmicutes; D_2__Clostridia; D_3__Clostridiales; D_4__Lachnospiraceae; D_5__Lachnoclostridium; D_6__uncultured bacterium; D_7__; D_8__; D_9__; D_10__; D_11__; D_12__; D_13__; D_14__
New.CleanUp.ReferenceOTU177398	4.71427	0.0299133	1	1	0.236842	0.631579	D_0__Bacteria; D_1__Firmicutes; D_2__Clostridia; D_3__Clostridiales; D_4__Lachnospiraceae
New.CleanUp.ReferenceOTU428955	4.68912	0.0303542	1	1	0.0789474	0.289474	D_0__Bacteria; D_1__Firmicutes; D_2__Clostridia; D_3__Clostridiales; D_4__Ruminococcaceae; D_5__Ruminococcus 2; D_6__uncultured bacterium; D_7__; D_8__; D_9__; D_10__; D_11__; D_12__; D_13__; D_14__
New.CleanUp.ReferenceOTU99591	4.67043	0.0306862	1	1	0.0789474	0.315789	D_0__Bacteria; D_1__Firmicutes; D_2__Clostridia; D_3__Clostridiales; D_4__Clostridiaceae 1; D_5__Sarcina; D_6__uncultured bacterium; D_7__; D_8__; D_9__; D_10__; D_11__; D_12__; D_13__; D_14__
HQ762308.1.1441	4.65685	0.03093	1	1	0.0789474	0.184211	D_0__Bacteria; D_1__Firmicutes; D_2__Clostridia; D_3__Clostridiales; D_4__Lachnospiraceae; D_5__Blautia; D_6__uncultured organism; D_7__; D_8__; D_9__; D_10__; D_11__; D_12__; D_13__; D_14__
New.CleanUp.ReferenceOTU296484	4.65685	0.03093	1	1	0.0526316	0.184211	D_0__Bacteria; D_1__Firmicutes; D_2__Clostridia; D_3__Clostridiales; D_4__Lachnospiraceae; D_5__Anaerostipes; D_6__uncultured bacterium; D_7__; D_8__; D_9__; D_10__; D_11__; D_12__; D_13__; D_14__
New.CleanUp.ReferenceOTU352141	4.65213	0.0310151	1	1	0.210526	0.0789474	D_0__Bacteria; D_1__Bacteroidetes; D_2__Bacteroidia; D_3__Bacteroidales; D_4__Bacteroidaceae; D_5__Bacteroides; D_6__uncultured bacterium; D_7__; D_8__; D_9__; D_10__; D_11__; D_12__; D_13__; D_14__
New.ReferenceOTU1901	4.61035	0.0317796	1	1	0.578947	0.157895	D_0__Bacteria; D_1__Firmicutes; D_2__Clostridia; D_3__Clostridiales; D_4__Peptostreptococcaceae; D_5__Terrisporobacter; D_6__uncultured bacterium; D_7__; D_8__; D_9__; D_10__; D_11__; D_12__; D_13__; D_14__
New.CleanUp.ReferenceOTU136007	4.59623	0.0320423	1	1	0.578947	0.210526	D_0__Bacteria; D_1__Firmicutes; D_2__Clostridia; D_3__Clostridiales; D_4__Lachnospiraceae; D_5__Lachnospiraceae ND3007 group; D_6__uncultured bacterium; D_7__; D_8__; D_9__; D_10__; D_11__; D_12__; D_13__; D_14__
New.CleanUp.ReferenceOTU141977	4.47673	0.0343595	1	1	0.947368	0.342105	D_0__Bacteria; D_1__Bacteroidetes; D_2__Bacteroidia; D_3__Bacteroidales; D_4__Bacteroidaceae; D_5__Bacteroides; D_6__uncultured bacterium; D_7__; D_8__; D_9__; D_10__; D_11__; D_12__; D_13__; D_14__
New.ReferenceOTU1522	4.45655	0.0347676	1	1	0.263158	0.736842	D_0__Bacteria; D_1__Firmicutes; D_2__Clostridia; D_3__Clostridiales; D_4__Lachnospiraceae; D_5__Blautia; D_6__uncultured bacterium; D_7__; D_8__; D_9__; D_10__; D_11__; D_12__; D_13__; D_14__
DQ796115.1.1363	4.45284	0.0348432	1	1	0.368421	0.105263	D_0__Bacteria; D_1__Firmicutes; D_2__Clostridia; D_3__Clostridiales; D_4__Peptostreptococcaceae; D_5__Peptoclostridium; D_6__uncultured bacterium; D_7__; D_8__; D_9__; D_10__; D_11__; D_12__; D_13__; D_14__
EU768401.1.1359	4.3588	0.0368181	1	1	0.342105	0.105263	D_0__Bacteria; D_1__Bacteroidetes; D_2__Bacteroidia; D_3__Bacteroidales; D_4__Bacteroidaceae; D_5__Bacteroides; D_6__uncultured bacterium; D_7__; D_8__; D_9__; D_10__; D_11__; D_12__; D_13__; D_14__
New.CleanUp.ReferenceOTU432769	4.32011	0.0376646	1	1	0.315789	1.07895	D_0__Bacteria; D_1__Firmicutes; D_2__Clostridia; D_3__Clostridiales; D_4__Ruminococcaceae
JF145712.1.1324	4.31807	0.0377097	1	1	0.131579	1.68421	D_0__Bacteria; D_1__Firmicutes; D_2__Clostridia; D_3__Clostridiales; D_4__Peptostreptococcaceae; D_5__Peptoclostridium; D_6__uncultured bacterium; D_7__; D_8__; D_9__; D_10__; D_11__; D_12__; D_13__; D_14__
New.CleanUp.ReferenceOTU231778	4.30716	0.0379523	1	1	0.894737	0.289474	D_0__Bacteria; D_1__Firmicutes; D_2__Clostridia; D_3__Clostridiales; D_4__Lachnospiraceae; D_5__Incertae Sedis; D_6__uncultured bacterium; D_7__; D_8__; D_9__; D_10__; D_11__; D_12__; D_13__; D_14__
EU774360.1.1361	4.29041	0.038328	1	1	0.0526316	0.421053	D_0__Bacteria; D_1__Firmicutes; D_2__Clostridia; D_3__Clostridiales; D_4__Lachnospiraceae
New.CleanUp.ReferenceOTU584501	4.25016	0.0392467	1	1	0.421053	0.763158	D_0__Bacteria; D_1__Firmicutes; D_2__Clostridia; D_3__Clostridiales; D_4__Lachnospiraceae; D_5__Fusicatenibacter; D_6__uncultured bacterium; D_7__; D_8__; D_9__; D_10__; D_11__; D_12__; D_13__; D_14__
New.ReferenceOTU322	4.22224	0.0398974	1	1	0.0526316	0.263158	D_0__Bacteria; D_1__Firmicutes; D_2__Clostridia; D_3__Clostridiales; D_4__Lachnospiraceae; D_5__Anaerostipes; D_6__uncultured bacterium; D_7__; D_8__; D_9__; D_10__; D_11__; D_12__; D_13__; D_14__
New.CleanUp.ReferenceOTU438218	4.22207	0.0399014	1	1	0.0526316	0.394737	D_0__Bacteria; D_1__Firmicutes; D_2__Clostridia; D_3__Clostridiales; D_4__Lachnospiraceae; D_5__Blautia; D_6__uncultured bacterium; D_7__; D_8__; D_9__; D_10__; D_11__; D_12__; D_13__; D_14__
DQ799486.1.1392	4.22158	0.0399129	1	1	1.60526	0.894737	D_0__Bacteria; D_1__Firmicutes; D_2__Clostridia; D_3__Clostridiales; D_4__Lachnospiraceae; D_5__Anaerostipes; D_6__uncultured bacterium; D_7__; D_8__; D_9__; D_10__; D_11__; D_12__; D_13__; D_14__
DQ825104.1.1391	4.16667	0.0412268	1	1	0.105263	0	D_0__Bacteria; D_1__Firmicutes; D_2__Clostridia; D_3__Clostridiales; D_4__Lachnospiraceae; D_5__Fusicatenibacter; D_6__uncultured bacterium; D_7__; D_8__; D_9__; D_10__; D_11__; D_12__; D_13__; D_14__
New.ReferenceOTU2249	4.16667	0.0412268	1	1	0	0.105263	D_0__Bacteria; D_1__Firmicutes; D_2__Clostridia; D_3__Clostridiales; D_4__Lachnospiraceae; D_5__Fusicatenibacter; D_6__uncultured bacterium; D_7__; D_8__; D_9__; D_10__; D_11__; D_12__; D_13__; D_14__
New.ReferenceOTU1832	4.16667	0.0412268	1	1	0.105263	0	Unassigned
New.CleanUp.ReferenceOTU269993	4.16667	0.0412268	1	1	0	0.105263	D_0__Bacteria; D_1__Firmicutes; D_2__Clostridia; D_3__Clostridiales; D_4__Lachnospiraceae
New.CleanUp.ReferenceOTU405163	4.16667	0.0412268	1	1	0	0.105263	D_0__Bacteria; D_1__Firmicutes; D_2__Clostridia; D_3__Clostridiales; D_4__Ruminococcaceae; D_5__Ruminococcus 2; D_6__uncultured bacterium; D_7__; D_8__; D_9__; D_10__; D_11__; D_12__; D_13__; D_14__
New.CleanUp.ReferenceOTU409076	4.16667	0.0412268	1	1	0	0.105263	D_0__Bacteria; D_1__Firmicutes; D_2__Clostridia; D_3__Clostridiales; D_4__Lachnospiraceae; D_5__Lachnoclostridium; D_6__uncultured bacterium; D_7__; D_8__; D_9__; D_10__; D_11__; D_12__; D_13__; D_14__
New.CleanUp.ReferenceOTU586496	4.16667	0.0412268	1	1	0	0.105263	D_0__Bacteria; D_1__Firmicutes; D_2__Clostridia; D_3__Clostridiales; D_4__Lachnospiraceae
CP007799.4645197.4646661	4.16438	0.0412824	1	1	0.763158	0	D_0__Bacteria; D_1__Proteobacteria; D_2__Gammaproteobacteria; D_3__Enterobacteriales; D_4__Enterobacteriaceae; D_5__Escherichia-Shigella
DQ796525.1.1383	4.16438	0.0412824	1	1	0.157895	0	D_0__Bacteria; D_1__Firmicutes; D_2__Clostridia; D_3__Clostridiales; D_4__Ruminococcaceae; D_5__Faecalibacterium; D_6__uncultured bacterium; D_7__; D_8__; D_9__; D_10__; D_11__; D_12__; D_13__; D_14__
EU775251.1.1362	4.16438	0.0412824	1	1	0.131579	0	D_0__Bacteria; D_1__Firmicutes; D_2__Clostridia; D_3__Clostridiales; D_4__Peptostreptococcaceae
New.ReferenceOTU2194	4.16438	0.0412824	1	1	0.184211	0	Unassigned
New.ReferenceOTU1851	4.16438	0.0412824	1	1	0.263158	0	D_0__Bacteria; D_1__Firmicutes; D_2__Clostridia; D_3__Clostridiales; D_4__Clostridiaceae 1; D_5__Clostridium sensu stricto 1; D_6__uncultured bacterium; D_7__; D_8__; D_9__; D_10__; D_11__; D_12__; D_13__; D_14__
New.ReferenceOTU65	4.16438	0.0412824	1	1	0.131579	0	D_0__Bacteria; D_1__Firmicutes; D_2__Clostridia; D_3__Clostridiales; D_4__Lachnospiraceae; D_5__Roseburia; D_6__uncultured bacterium; D_7__; D_8__; D_9__; D_10__; D_11__; D_12__; D_13__; D_14__
New.CleanUp.ReferenceOTU4375	4.16438	0.0412824	1	1	0	0.157895	D_0__Bacteria; D_1__Firmicutes; D_2__Clostridia; D_3__Clostridiales; D_4__Ruminococcaceae; D_5__Subdoligranulum; D_6__uncultured bacterium; D_7__; D_8__; D_9__; D_10__; D_11__; D_12__; D_13__; D_14__
New.CleanUp.ReferenceOTU9520	4.16438	0.0412824	1	1	0	0.157895	D_0__Bacteria; D_1__Firmicutes; D_2__Clostridia; D_3__Clostridiales; D_4__Lachnospiraceae; D_5__Lachnospiraceae NK4A136 group; D_6__uncultured bacterium; D_7__; D_8__; D_9__; D_10__; D_11__; D_12__; D_13__; D_14__
New.CleanUp.ReferenceOTU117020	4.16438	0.0412824	1	1	0.184211	0	D_0__Bacteria; D_1__Firmicutes; D_2__Clostridia; D_3__Clostridiales; D_4__Lachnospiraceae; D_5__[Eubacterium] hallii group; D_6__uncultured bacterium; D_7__; D_8__; D_9__; D_10__; D_11__; D_12__; D_13__; D_14__
New.CleanUp.ReferenceOTU161416	4.16438	0.0412824	1	1	0	0.157895	D_0__Bacteria; D_1__Firmicutes; D_2__Clostridia; D_3__Clostridiales; D_4__Ruminococcaceae
New.CleanUp.ReferenceOTU173198	4.16438	0.0412824	1	1	0.131579	0	D_0__Bacteria; D_1__Firmicutes; D_2__Negativicutes; D_3__Selenomonadales; D_4__Acidaminococcaceae; D_5__Phascolarctobacterium; D_6__uncultured bacterium; D_7__; D_8__; D_9__; D_10__; D_11__; D_12__; D_13__; D_14__
New.CleanUp.ReferenceOTU190291	4.16438	0.0412824	1	1	0	0.263158	D_0__Bacteria; D_1__Firmicutes; D_2__Clostridia; D_3__Clostridiales; D_4__Lachnospiraceae; D_5__Fusicatenibacter; D_6__uncultured bacterium; D_7__; D_8__; D_9__; D_10__; D_11__; D_12__; D_13__; D_14__
New.CleanUp.ReferenceOTU238443	4.16438	0.0412824	1	1	0.210526	0	D_0__Bacteria; D_1__Bacteroidetes; D_2__Bacteroidia; D_3__Bacteroidales; D_4__Bacteroidaceae; D_5__Bacteroides; D_6__uncultured bacterium; D_7__; D_8__; D_9__; D_10__; D_11__; D_12__; D_13__; D_14__
New.CleanUp.ReferenceOTU296727	4.16438	0.0412824	1	1	0	0.236842	D_0__Bacteria; D_1__Firmicutes; D_2__Clostridia; D_3__Clostridiales; D_4__Lachnospiraceae
New.CleanUp.ReferenceOTU395033	4.16438	0.0412824	1	1	0	0.131579	D_0__Bacteria; D_1__Firmicutes; D_2__Clostridia; D_3__Clostridiales; D_4__Lachnospiraceae; D_5__Blautia; D_6__uncultured bacterium; D_7__; D_8__; D_9__; D_10__; D_11__; D_12__; D_13__; D_14__
New.CleanUp.ReferenceOTU423030	4.16438	0.0412824	1	1	0.131579	0	D_0__Bacteria; D_1__Firmicutes; D_2__Clostridia; D_3__Clostridiales; D_4__Lachnospiraceae; D_5__Dorea; D_6__uncultured bacterium; D_7__; D_8__; D_9__; D_10__; D_11__; D_12__; D_13__; D_14__
New.CleanUp.ReferenceOTU432934	4.16438	0.0412824	1	1	0.184211	0	D_0__Bacteria; D_1__Bacteroidetes; D_2__Bacteroidetes VC2.1 Bac22; D_3__uncultured bacterium; D_4__; D_5__; D_6__; D_7__; D_8__; D_9__; D_10__; D_11__; D_12__; D_13__; D_14__
New.CleanUp.ReferenceOTU484587	4.16438	0.0412824	1	1	0	0.131579	D_0__Bacteria; D_1__Firmicutes; D_2__Clostridia; D_3__Clostridiales; D_4__Ruminococcaceae; D_5__Faecalibacterium; D_6__uncultured bacterium; D_7__; D_8__; D_9__; D_10__; D_11__; D_12__; D_13__; D_14__
JF195529.1.1348	4.16362	0.041301	1	1	0.157895	0	D_0__Bacteria; D_1__Actinobacteria; D_2__Actinobacteria; D_3__Micrococcales; D_4__Micrococcaceae; D_5__Rothia; D_6__uncultured bacterium; D_7__; D_8__; D_9__; D_10__; D_11__; D_12__; D_13__; D_14__
DQ777967.1.1465	4.16362	0.041301	1	1	0	0.157895	D_0__Bacteria; D_1__Firmicutes; D_2__Clostridia; D_3__Clostridiales; D_4__Lachnospiraceae; D_5__Blautia; D_6__uncultured bacterium; D_7__; D_8__; D_9__; D_10__; D_11__; D_12__; D_13__; D_14__
New.CleanUp.ReferenceOTU37525	4.16362	0.041301	1	1	0	0.210526	D_0__Bacteria; D_1__Bacteroidetes; D_2__Bacteroidia; D_3__Bacteroidales; D_4__Bacteroidaceae; D_5__Bacteroides; D_6__uncultured bacterium; D_7__; D_8__; D_9__; D_10__; D_11__; D_12__; D_13__; D_14__
New.CleanUp.ReferenceOTU71541	4.16362	0.041301	1	1	0	0.157895	D_0__Bacteria; D_1__Firmicutes; D_2__Clostridia; D_3__Clostridiales; D_4__Ruminococcaceae; D_5__uncultured; D_6__uncultured organism; D_7__; D_8__; D_9__; D_10__; D_11__; D_12__; D_13__; D_14__
New.CleanUp.ReferenceOTU425257	4.16362	0.041301	1	1	0	0.157895	D_0__Bacteria; D_1__Firmicutes; D_2__Clostridia; D_3__Clostridiales; D_4__Lachnospiraceae; D_5__Fusicatenibacter; D_6__uncultured bacterium; D_7__; D_8__; D_9__; D_10__; D_11__; D_12__; D_13__; D_14__
New.CleanUp.ReferenceOTU524012	4.16362	0.041301	1	1	0.210526	0	D_0__Bacteria; D_1__Bacteroidetes; D_2__Bacteroidia; D_3__Bacteroidales; D_4__Bacteroidaceae; D_5__Bacteroides; D_6__uncultured organism; D_7__; D_8__; D_9__; D_10__; D_11__; D_12__; D_13__; D_14__
EU775633.1.1402	4.16324	0.0413102	1	1	0.263158	0	D_0__Bacteria; D_1__Proteobacteria; D_2__Gammaproteobacteria; D_3__Enterobacteriales; D_4__Enterobacteriaceae
DQ807545.1.1390	4.16324	0.0413102	1	1	0	0.184211	D_0__Bacteria; D_1__Firmicutes; D_2__Clostridia; D_3__Clostridiales; D_4__Lachnospiraceae; D_5__Blautia; D_6__uncultured bacterium; D_7__; D_8__; D_9__; D_10__; D_11__; D_12__; D_13__; D_14__
DQ807357.1.1390	4.16324	0.0413102	1	1	0.184211	0	D_0__Bacteria; D_1__Firmicutes; D_2__Clostridia; D_3__Clostridiales; D_4__Lachnospiraceae
New.CleanUp.ReferenceOTU156095	4.16324	0.0413102	1	1	0	0.210526	D_0__Bacteria; D_1__Firmicutes; D_2__Clostridia; D_3__Clostridiales; D_4__Lachnospiraceae; D_5__Lachnoclostridium; D_6__uncultured bacterium; D_7__; D_8__; D_9__; D_10__; D_11__; D_12__; D_13__; D_14__
New.CleanUp.ReferenceOTU421638	4.16324	0.0413102	1	1	0.184211	0	Unassigned
New.CleanUp.ReferenceOTU554818	4.16324	0.0413102	1	1	0.210526	0	Unassigned
EU765715.1.1355	4.16286	0.0413195	1	1	0.263158	0	D_0__Bacteria; D_1__Firmicutes; D_2__Clostridia; D_3__Clostridiales; D_4__Lachnospiraceae; D_5__Lachnospiraceae UCG-005; D_6__uncultured bacterium; D_7__; D_8__; D_9__; D_10__; D_11__; D_12__; D_13__; D_14__
New.CleanUp.ReferenceOTU281895	4.16286	0.0413195	1	1	0	0.263158	Unassigned
New.CleanUp.ReferenceOTU326937	4.16286	0.0413195	1	1	1.05263	0	D_0__Bacteria; D_1__Firmicutes; D_2__Clostridia; D_3__Clostridiales; D_4__Ruminococcaceae; D_5__Ruminiclostridium 5; D_6__uncultured bacterium; D_7__; D_8__; D_9__; D_10__; D_11__; D_12__; D_13__; D_14__
New.CleanUp.ReferenceOTU470654	4.16286	0.0413195	1	1	0	0.263158	D_0__Bacteria; D_1__Firmicutes; D_2__Clostridia; D_3__Clostridiales; D_4__Lachnospiraceae; D_5__Pseudobutyrivibrio; D_6__uncultured bacterium; D_7__; D_8__; D_9__; D_10__; D_11__; D_12__; D_13__; D_14__
New.ReferenceOTU1373	4.1385	0.0419184	1	1	1.07895	0.5	Unassigned
DQ804660.1.1397	4.10916	0.0426516	1	1	0.973684	0.421053	D_0__Bacteria; D_1__Firmicutes; D_2__Clostridia; D_3__Clostridiales; D_4__Lachnospiraceae
New.CleanUp.ReferenceOTU489723	4.09091	0.0431144	1	1	0.0526316	0.210526	D_0__Bacteria
New.ReferenceOTU2200	4.08527	0.0432586	1	1	1.13158	0.763158	D_0__Bacteria; D_1__Firmicutes; D_2__Clostridia; D_3__Clostridiales; D_4__Lachnospiraceae
New.ReferenceOTU1550	4.07431	0.0435402	1	1	0.289474	1.28947	D_0__Bacteria; D_1__Firmicutes; D_2__Clostridia; D_3__Clostridiales; D_4__Lachnospiraceae
New.CleanUp.ReferenceOTU337795	4.06562	0.0437646	1	1	0.131579	0.5	D_0__Bacteria; D_1__Firmicutes; D_2__Clostridia; D_3__Clostridiales; D_4__Lachnospiraceae; D_5__Blautia; D_6__uncultured bacterium; D_7__; D_8__; D_9__; D_10__; D_11__; D_12__; D_13__; D_14__
New.ReferenceOTU2376	4.05352	0.0440795	1	1	0.473684	0.210526	D_0__Bacteria; D_1__Firmicutes; D_2__Clostridia; D_3__Clostridiales; D_4__Ruminococcaceae; D_5__Faecalibacterium; D_6__uncultured bacterium; D_7__; D_8__; D_9__; D_10__; D_11__; D_12__; D_13__; D_14__
New.CleanUp.ReferenceOTU468432	4.03792	0.0444886	1	1	0.0263158	0.263158	D_0__Bacteria; D_1__Firmicutes; D_2__Clostridia; D_3__Clostridiales; D_4__Ruminococcaceae; D_5__Subdoligranulum; D_6__uncultured bacterium; D_7__; D_8__; D_9__; D_10__; D_11__; D_12__; D_13__; D_14__
New.CleanUp.ReferenceOTU590953	4.0366	0.0445233	1	1	0.0263158	0.368421	D_0__Bacteria; D_1__Firmicutes; D_2__Clostridia; D_3__Clostridiales; D_4__Ruminococcaceae
New.CleanUp.ReferenceOTU48509	3.99575	0.0456152	1	1	0.263158	0.0263158	Unassigned
New.CleanUp.ReferenceOTU137703	3.99575	0.0456152	1	1	0.0263158	0.289474	D_0__Bacteria; D_1__Firmicutes; D_2__Clostridia; D_3__Clostridiales; D_4__Lachnospiraceae; D_5__Lachnoclostridium; D_6__uncultured bacterium; D_7__; D_8__; D_9__; D_10__; D_11__; D_12__; D_13__; D_14__
KF843322.1.1414	3.96688	0.0464037	1	1	0.289474	0.0789474	D_0__Bacteria; D_1__Bacteroidetes; D_2__Bacteroidia; D_3__Bacteroidales; D_4__Bacteroidaceae; D_5__Bacteroides; D_6__uncultured bacterium; D_7__; D_8__; D_9__; D_10__; D_11__; D_12__; D_13__; D_14__
New.CleanUp.ReferenceOTU149708	3.96688	0.0464037	1	1	0.315789	0.0789474	D_0__Bacteria; D_1__Firmicutes; D_2__Clostridia; D_3__Clostridiales; D_4__Lachnospiraceae
New.CleanUp.ReferenceOTU335617	3.96688	0.0464037	1	1	0.315789	0.0789474	D_0__Bacteria; D_1__Firmicutes; D_2__Clostridia; D_3__Clostridiales; D_4__Lachnospiraceae
EU768383.1.1358	3.9566	0.0466879	1	1	0.210526	0.0263158	D_0__Bacteria; D_1__Bacteroidetes; D_2__Bacteroidia; D_3__Bacteroidales; D_4__Porphyromonadaceae; D_5__Parabacteroides; D_6__uncultured bacterium; D_7__; D_8__; D_9__; D_10__; D_11__; D_12__; D_13__; D_14__
FJ369911.1.1359	3.9566	0.0466879	1	1	0.0263158	0.210526	D_0__Bacteria; D_1__Firmicutes; D_2__Clostridia; D_3__Clostridiales; D_4__Lachnospiraceae; D_5__Fusicatenibacter; D_6__uncultured bacterium; D_7__; D_8__; D_9__; D_10__; D_11__; D_12__; D_13__; D_14__
DQ809367.1.1384	3.9566	0.0466879	1	1	0.0263158	0.210526	D_0__Bacteria; D_1__Firmicutes; D_2__Clostridia; D_3__Clostridiales; D_4__Ruminococcaceae; D_5__Subdoligranulum; D_6__uncultured bacterium; D_7__; D_8__; D_9__; D_10__; D_11__; D_12__; D_13__; D_14__
New.ReferenceOTU1158	3.9566	0.0466879	1	1	0.0263158	0.263158	D_0__Bacteria; D_1__Firmicutes; D_2__Clostridia; D_3__Clostridiales; D_4__Lachnospiraceae; D_5__[Eubacterium] ruminantium group; D_6__uncultured bacterium; D_7__; D_8__; D_9__; D_10__; D_11__; D_12__; D_13__; D_14__
New.CleanUp.ReferenceOTU207828	3.9566	0.0466879	1	1	0.210526	0.0263158	D_0__Bacteria; D_1__Firmicutes; D_2__Clostridia; D_3__Clostridiales; D_4__Lachnospiraceae
New.CleanUp.ReferenceOTU462504	3.9566	0.0466879	1	1	0.210526	0.0263158	D_0__Bacteria; D_1__Firmicutes; D_2__Erysipelotrichia; D_3__Erysipelotrichales; D_4__Erysipelotrichaceae; D_5__Turicibacter; D_6__uncultured bacterium; D_7__; D_8__; D_9__; D_10__; D_11__; D_12__; D_13__; D_14__
New.ReferenceOTU1871	3.95638	0.0466939	1	1	0.0263158	0.342105	D_0__Bacteria; D_1__Firmicutes; D_2__Clostridia; D_3__Clostridiales
New.CleanUp.ReferenceOTU58396	3.95638	0.0466939	1	1	0.236842	0.0263158	Unassigned
New.CleanUp.ReferenceOTU136274	3.95638	0.0466939	1	1	0.0263158	0.552632	D_0__Bacteria; D_1__Firmicutes; D_2__Clostridia; D_3__Clostridiales; D_4__Ruminococcaceae; D_5__Ruminococcaceae NK4A214 group; D_6__uncultured bacterium; D_7__; D_8__; D_9__; D_10__; D_11__; D_12__; D_13__; D_14__
New.CleanUp.ReferenceOTU576009	3.93655	0.0472476	1	1	0.210526	0.894737	Unassigned
New.CleanUp.ReferenceOTU296107	3.93217	0.0473709	1	1	0.263158	0.0789474	Unassigned
New.CleanUp.ReferenceOTU58753	3.92858	0.0474721	1	1	0.315789	0.105263	D_0__Bacteria; D_1__Firmicutes; D_2__Clostridia; D_3__Clostridiales; D_4__Lachnospiraceae; D_5__Lachnoclostridium; D_6__uncultured bacterium; D_7__; D_8__; D_9__; D_10__; D_11__; D_12__; D_13__; D_14__
New.CleanUp.ReferenceOTU200122	3.92609	0.0475425	1	1	0.394737	0.157895	D_0__Bacteria; D_1__Firmicutes; D_2__Clostridia; D_3__Clostridiales; D_4__Lachnospiraceae
New.ReferenceOTU215	3.92375	0.0476085	1	1	0.684211	0.263158	D_0__Bacteria; D_1__Firmicutes; D_2__Clostridia; D_3__Clostridiales; D_4__Lachnospiraceae
FJ365817.1.1359	3.91847	0.0477582	1	1	0.184211	0.0263158	D_0__Bacteria; D_1__Firmicutes; D_2__Clostridia; D_3__Clostridiales; D_4__Lachnospiraceae; D_5__Lachnoclostridium; D_6__uncultured bacterium; D_7__; D_8__; D_9__; D_10__; D_11__; D_12__; D_13__; D_14__
DQ802296.1.1390	3.91847	0.0477582	1	1	0.184211	0.0263158	D_0__Bacteria; D_1__Firmicutes; D_2__Clostridia; D_3__Clostridiales; D_4__Lachnospiraceae
EU458488.1.1400	3.91847	0.0477582	1	1	0.210526	0.0263158	D_0__Bacteria; D_1__Bacteroidetes; D_2__Bacteroidia; D_3__Bacteroidales; D_4__Bacteroidaceae; D_5__Bacteroides
KF066163.1.1348	3.91847	0.0477582	1	1	0.210526	0.0263158	D_0__Bacteria; D_1__Firmicutes; D_2__Clostridia; D_3__Clostridiales; D_4__Family XI; D_5__Parvimonas; D_6__uncultured bacterium; D_7__; D_8__; D_9__; D_10__; D_11__; D_12__; D_13__; D_14__
EU773398.1.1390	3.91847	0.0477582	1	1	0.184211	0.0263158	D_0__Bacteria; D_1__Firmicutes; D_2__Clostridia; D_3__Clostridiales; D_4__Lachnospiraceae
DQ806181.1.1394	3.91847	0.0477582	1	1	0.0263158	0.184211	D_0__Bacteria; D_1__Firmicutes; D_2__Clostridia; D_3__Clostridiales; D_4__Ruminococcaceae; D_5__Anaerotruncus; D_6__uncultured bacterium; D_7__; D_8__; D_9__; D_10__; D_11__; D_12__; D_13__; D_14__
FJ557662.1.1407	3.91847	0.0477582	1	1	0.0263158	0.210526	D_0__Bacteria; D_1__Firmicutes; D_2__Bacilli; D_3__Lactobacillales; D_4__Streptococcaceae; D_5__Streptococcus; D_6__uncultured bacterium; D_7__; D_8__; D_9__; D_10__; D_11__; D_12__; D_13__; D_14__
New.CleanUp.ReferenceOTU39299	3.91847	0.0477582	1	1	0.0263158	0.184211	D_0__Bacteria; D_1__Firmicutes; D_2__Clostridia; D_3__Clostridiales; D_4__Lachnospiraceae
New.CleanUp.ReferenceOTU166255	3.91847	0.0477582	1	1	0.0263158	0.236842	Unassigned
New.CleanUp.ReferenceOTU232839	3.91847	0.0477582	1	1	0.0263158	0.184211	D_0__Bacteria; D_1__Firmicutes; D_2__Clostridia; D_3__Clostridiales; D_4__Lachnospiraceae
New.CleanUp.ReferenceOTU235825	3.91847	0.0477582	1	1	0.184211	0.0263158	D_0__Bacteria; D_1__Firmicutes; D_2__Clostridia; D_3__Clostridiales; D_4__Lachnospiraceae
New.CleanUp.ReferenceOTU264770	3.91847	0.0477582	1	1	0.184211	0.0263158	D_0__Bacteria; D_1__Firmicutes; D_2__Clostridia; D_3__Clostridiales; D_4__Lachnospiraceae; D_5__Roseburia; D_6__uncultured bacterium; D_7__; D_8__; D_9__; D_10__; D_11__; D_12__; D_13__; D_14__
New.CleanUp.ReferenceOTU348156	3.91847	0.0477582	1	1	0.0263158	0.210526	D_0__Bacteria; D_1__Firmicutes; D_2__Clostridia; D_3__Clostridiales; D_4__Ruminococcaceae
New.CleanUp.ReferenceOTU348413	3.91847	0.0477582	1	1	0.184211	0.0263158	D_0__Bacteria; D_1__Firmicutes; D_2__Clostridia; D_3__Clostridiales; D_4__Lachnospiraceae; D_5__Lachnospiraceae UCG-008; D_6__uncultured bacterium; D_7__; D_8__; D_9__; D_10__; D_11__; D_12__; D_13__; D_14__
New.CleanUp.ReferenceOTU388703	3.91847	0.0477582	1	1	0.0263158	0.184211	D_0__Bacteria; D_1__Firmicutes; D_2__Clostridia; D_3__Clostridiales; D_4__Lachnospiraceae; D_5__Lachnoclostridium; D_6__uncultured bacterium; D_7__; D_8__; D_9__; D_10__; D_11__; D_12__; D_13__; D_14__
New.CleanUp.ReferenceOTU510661	3.91847	0.0477582	1	1	0.184211	0.0263158	D_0__Bacteria; D_1__Firmicutes; D_2__Clostridia; D_3__Clostridiales; D_4__Lachnospiraceae
New.CleanUp.ReferenceOTU512845	3.91847	0.0477582	1	1	0.0263158	0.184211	D_0__Bacteria; D_1__Firmicutes; D_2__Clostridia; D_3__Clostridiales; D_4__Lachnospiraceae; D_5__Roseburia; D_6__uncultured bacterium; D_7__; D_8__; D_9__; D_10__; D_11__; D_12__; D_13__; D_14__
DQ797807.1.1365	3.88199	0.0488067	1	1	0.157895	0.0263158	D_0__Bacteria; D_1__Firmicutes; D_2__Clostridia; D_3__Clostridiales; D_4__Lachnospiraceae; D_5__Lachnospiraceae ND3007 group; D_6__uncultured bacterium; D_7__; D_8__; D_9__; D_10__; D_11__; D_12__; D_13__; D_14__
New.CleanUp.ReferenceOTU394015	3.88199	0.0488067	1	1	0.0263158	0.157895	D_0__Bacteria; D_1__Firmicutes; D_2__Clostridia; D_3__Clostridiales; D_4__Ruminococcaceae
New.CleanUp.ReferenceOTU218472	3.86878	0.0491922	1	1	0.0789474	0.421053	D_0__Bacteria; D_1__Firmicutes; D_2__Clostridia; D_3__Clostridiales; D_4__Lachnospiraceae; D_5__Fusicatenibacter; D_6__uncultured bacterium; D_7__; D_8__; D_9__; D_10__; D_11__; D_12__; D_13__; D_14__
FJ369884.1.1340	3.8661	0.0492709	1	1	0.236842	0.0789474	D_0__Bacteria; D_1__Firmicutes; D_2__Clostridia; D_3__Clostridiales; D_4__Lachnospiraceae; D_5__Blautia; D_6__uncultured bacterium; D_7__; D_8__; D_9__; D_10__; D_11__; D_12__; D_13__; D_14__
New.CleanUp.ReferenceOTU353765	3.8661	0.0492709	1	1	0.105263	0.263158	D_0__Bacteria; D_1__Firmicutes; D_2__Clostridia; D_3__Clostridiales; D_4__Lachnospiraceae; D_5__Anaerostipes; D_6__uncultured bacterium; D_7__; D_8__; D_9__; D_10__; D_11__; D_12__; D_13__; D_14__
DQ806091.1.1399	3.85036	0.0497352	1	1	0.763158	0.315789	D_0__Bacteria; D_1__Bacteroidetes; D_2__Bacteroidia; D_3__Bacteroidales; D_4__Bacteroidaceae; D_5__Bacteroides; D_6__uncultured bacterium; D_7__; D_8__; D_9__; D_10__; D_11__; D_12__; D_13__; D_14__
New.CleanUp.ReferenceOTU75608	3.84331	0.0499448	1	1	0.342105	0.631579	D_0__Bacteria; D_1__Firmicutes; D_2__Clostridia; D_3__Clostridiales; D_4__Lachnospiraceae

## Sheet: overview
families	absolut	percent (of 161)
Lachnospiraceae	101	63
Ruminococcaceae	24	15
Unassigned	15
Streptococcaceae	12
Bacteroidaceae	9
Peptostreptococcaceae	6
Clostridiaceae	2
Enterobacteriaceae	2
Lactobacillaceae	1
Christensenellaceae	1
Rikenellaceae	1
Micrococcaceae	1
Clostridiales Family XI	1
176 OTUs p< .05
of which 161 bacteria
