# Supplementary figures and images for: Intestinal Microbiome in Irritable Bowel Syndrome before and after Gut-Directed Hypnotherapy
Source: MDPI journal article supplement (doi:10.3390/ijms19113619), 2018-11-16

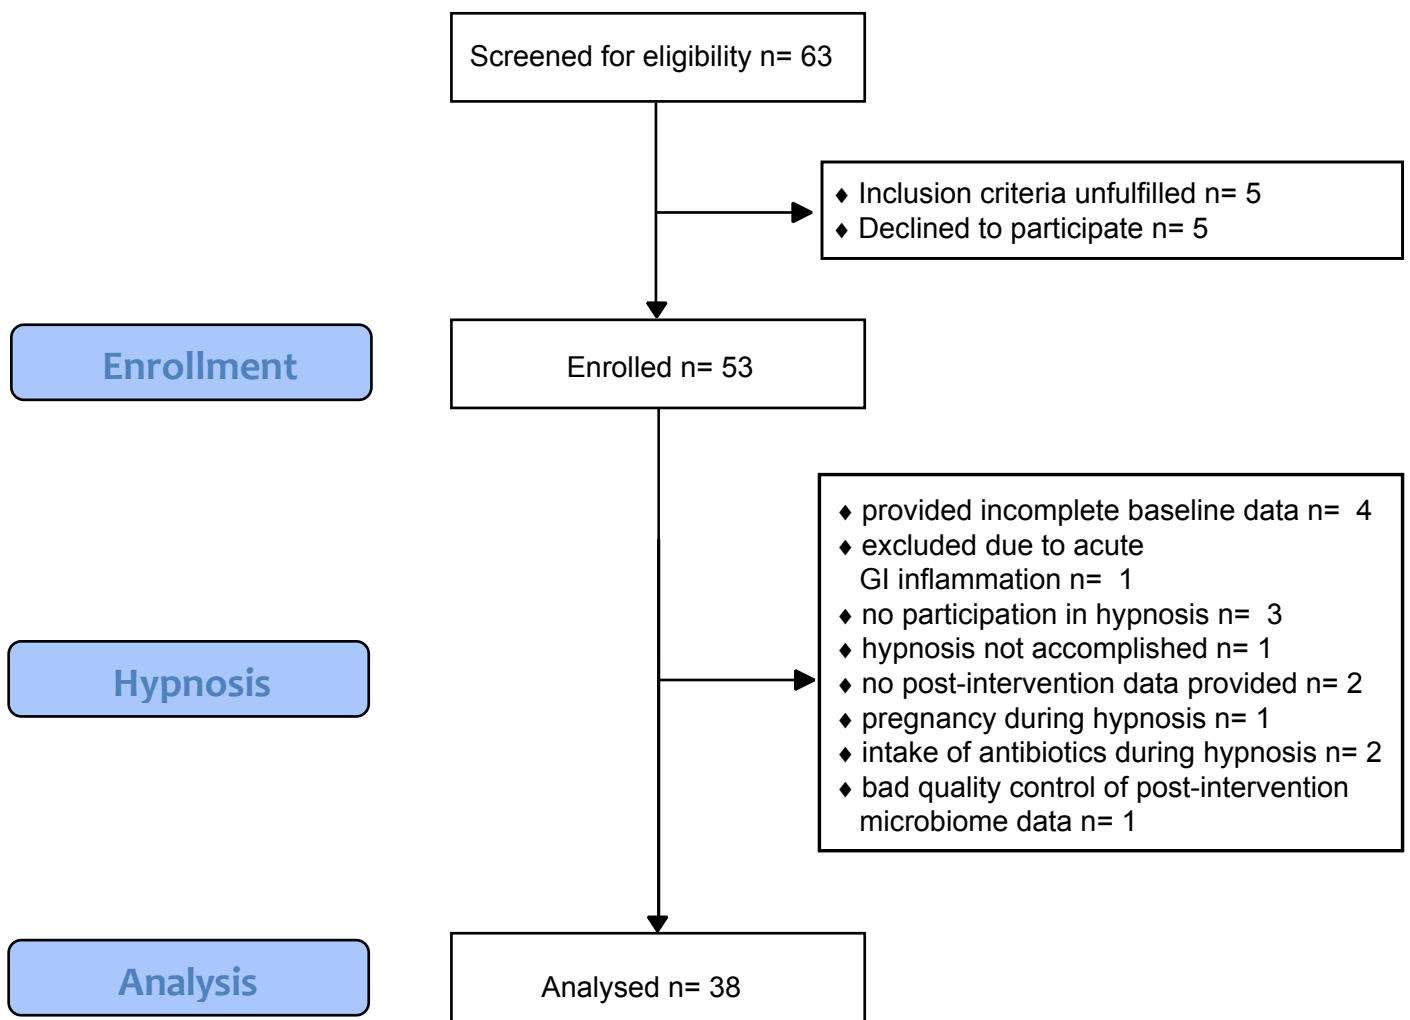

**Figure S6.** Patient Flow Diagram.

Supplement: s1 [file s1]
